# Supplementary material
Source: PubMed Central journal article supplement (PMC2148318)
Supplement: pnas_0708818104_3.pdf [file pnas_0708818104_3.pdf]

**Table 1. Blood indices of *Nix*<sup>-/-</sup> mice.**

|          | Hct, %  | WBC,<br>X10 <sup>3</sup> /μl | RBC,<br>X10 <sup>6</sup> /μl | Platelets,<br>X10 <sup>3</sup> /μl | Reticulo-<br>cytes, %   | Mitotracker<br>Red, %    |
|----------|---------|------------------------------|------------------------------|------------------------------------|-------------------------|--------------------------|
| +/, n=5  | 46 ± 1  | 13.8 ± 4.6                   | 9.4 ± 0.6                    | 488 ± 102                          | 2.2 ± 0.1               | 1.1 ± 0.1                |
| -/, n=12 | 35 ± 2* | 15.5 ± 6.0                   | 6.7 ± 0.5 <sup>†</sup>       | 583 ± 94                           | 32.3 ± 9.7 <sup>‡</sup> | 53.4 ± 10.7 <sup>§</sup> |

Hct, hematocrit; WBC, white blood cell count; RBC, red blood cell count.

\* $P=1.28 \times 10^{-9}$

‡ $P=3.44 \times 10^{-7}$

† $P=7.70 \times 10^{-5}$

§ $P=3.04 \times 10^{-9}$
