# Supplementary material
Source: PubMed Central journal article supplement (PMC2148318)
Supplement: pnas_0708818104_4.pdf [file pnas_0708818104_4.pdf]

**Table 2. The NIX phenotype is intrinsic to the bone marrow.**

|                                 | 1 month post-transplant   |                   | 2.5 months post-transplant |                   | 5.5 months post-transplant |                   |
|---------------------------------|---------------------------|-------------------|----------------------------|-------------------|----------------------------|-------------------|
| Donor mouse genotype            | RBC, X10 <sup>6</sup> /μl | Reticulo-cytes, % | RBC, X10 <sup>6</sup> /μl  | Reticulo-cytes, % | RBC, X10 <sup>6</sup> /μl  | Reticulo-cytes, % |
| <i>Nix</i> <sup>+/+</sup> , n=5 | 8.8 ± 0.5                 | 7 ± 1             | 8.3 ± 0.7                  | 4 ± 1             | 8.3 ± 0.3                  | 4 ± 1             |
| <i>Nix</i> <sup>-/-</sup> , n=5 | 7.5 ± 0.5                 | 48 ± 6            | 6.1 ± 0.3                  | 60 ± 2            | 5.5 ± 0.2                  | 64 ± 9            |
| <i>Nix</i> <sup>-/-</sup> , n=5 | 7.0 ± 0.2                 | 48 ± 1            | 5.7 ± 0.3                  | 62 ± 1            | 5.7 ± 0.4                  | 58 ± 2            |

RBC, red blood cell count.
