# Supplementary material
Source: PubMed Central journal article supplement (PMC2148318)
Supplement: pnas_0708818104_5.pdf [file pnas_0708818104_5.pdf]

**Table 3. The erythroid maturation defect caused by BCL-X<sub>L</sub> deficiency is rescued by combined deficiency of BAX and BAK.**

| Genotype                                                                     | ID no.-sex | Age, weeks | Spleen, g | RBC, X10 <sup>6</sup> /μl |
|------------------------------------------------------------------------------|------------|------------|-----------|---------------------------|
| <i>BclX<sup>fl/fl</sup>;Bax<sup>-fl</sup>;Bak<sup>-/-</sup>;Tg(MMTV-Cre)</i> | 835-M      | 24         | 0.36      | 8.2                       |
| <i>BclX<sup>fl/fl</sup>;Bax<sup>+/-</sup>;Bak<sup>-/-</sup>;Tg(MMTV-Cre)</i> | 837-M      | 24         | 2.25      | 3.3                       |
| <i>BclX<sup>fl/fl</sup>;Bax<sup>+/-</sup>;Bak<sup>-/-</sup>;Tg(MMTV-Cre)</i> | 839-M      | 24         | 2.54      | 3.8                       |
| <i>BclX<sup>fl/fl</sup>;Bax<sup>-fl</sup>;Bak<sup>-/-</sup>;Tg(MMTV-Cre)</i> | 836-F      | 16         | ND        | 9.7                       |
| <i>BclX<sup>fl/fl</sup>;Bax<sup>+fl</sup>;Bak<sup>-/-</sup>;Tg(MMTV-Cre)</i> | 838-F      | 16         | 3.39      | 1.7                       |
| <i>BclX<sup>fl/fl</sup>;Bax<sup>+fl</sup>;Bak<sup>-/-</sup>;Tg(MMTV-Cre)</i> | 840-F      | 16         | 3.11      | 1.5                       |
| <i>BclX<sup>fl/fl</sup>;Bax<sup>-fl</sup>;Bak<sup>-/-</sup>;Tg(MMTV-Cre)</i> | 836-F      | 35         | 0.46      | 7.9                       |

ND, not determined; RBC, red blood cell count; M, male; F, female.
