# Supplementary material
Source: PubMed Central journal article supplement (PMC2148318)

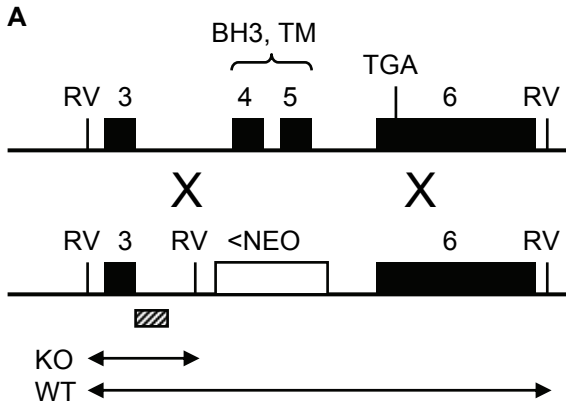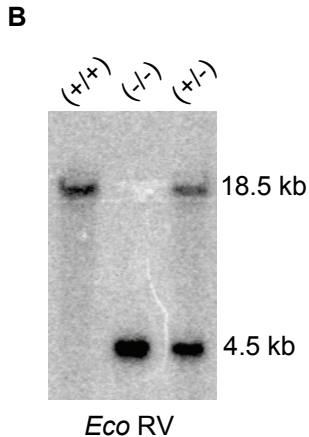

Supplement: pnas_0708818104_1.pdf [file pnas_0708818104_1.pdf]

**A***Nix*<sup>+/+</sup>*Nix*<sup>-/-</sup>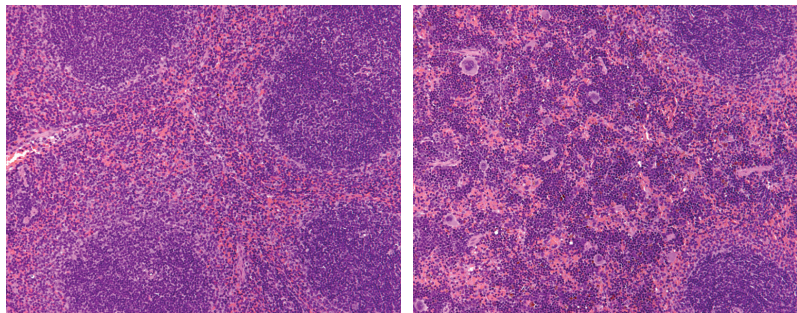**B**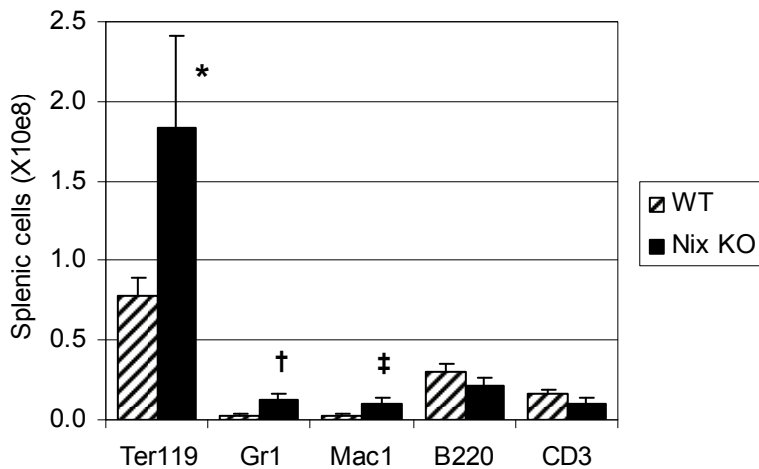

Supplement: pnas_0708818104_2.pdf [file pnas_0708818104_2.pdf]
